# Supplementary material for: Green Synthesis of New Pyrrolo [1,2-a] quinoxalines as Antiproliferative Agents in GPER-expressing Breast Cancer Cells
Source: Hindawi journal article supplement (doi:10.1155/2021/5596816), 2021-10-31

Supplementary Material for:

**Synthesis and structure-activity relationships of new pyrrolo[1,2-*a*]quinoxalines acting as anti-proliferative agents in GPER-expressing breast cancer cells**

Sarah Mazzotta1, Gabriele Carullo2, Francesca Giordano3, and Francesca Aiello*3

1Department of Pharmaceutical Sciences, Via Luigi Mangiagalli 25, 20133 Milano, Italy

2Department of Biotechnology, Chemistry and Pharmacy, DoE 2018-2022, University of Siena, Via Aldo Moro 2, 53100 Siena, Italy

3Department of Pharmacy, Health and Nutritional Sciences, DoE 2018-2022, University of Calabria Edificio Polifunzionale, 87036 Arcavacata di Rende (CS) Italy

*Corresponding author: Francesca Aiello [francesca.aiello@unical.it](mailto:francesca.aiello@unical.it)

**Table of Contents**

**S1**. MS (EI) spectrum of compound **18**

**S2**. 1H and 13C NMR spectra for compound **18**

**S3**. MS (EI) spectrum of compound **19**

**S4**. 1H and 13C NMR spectra for compound **19**

**S5**. MS (EI) spectrum of compound **20**

**S6**. 1H and 13C NMR spectra for compound **20**

**S7**. MS (EI) spectrum of compound **21**

**S8**. 1H and 13C NMR spectra for compound **21**

**S1**. MS (EI) spectrum of compound **18**

**
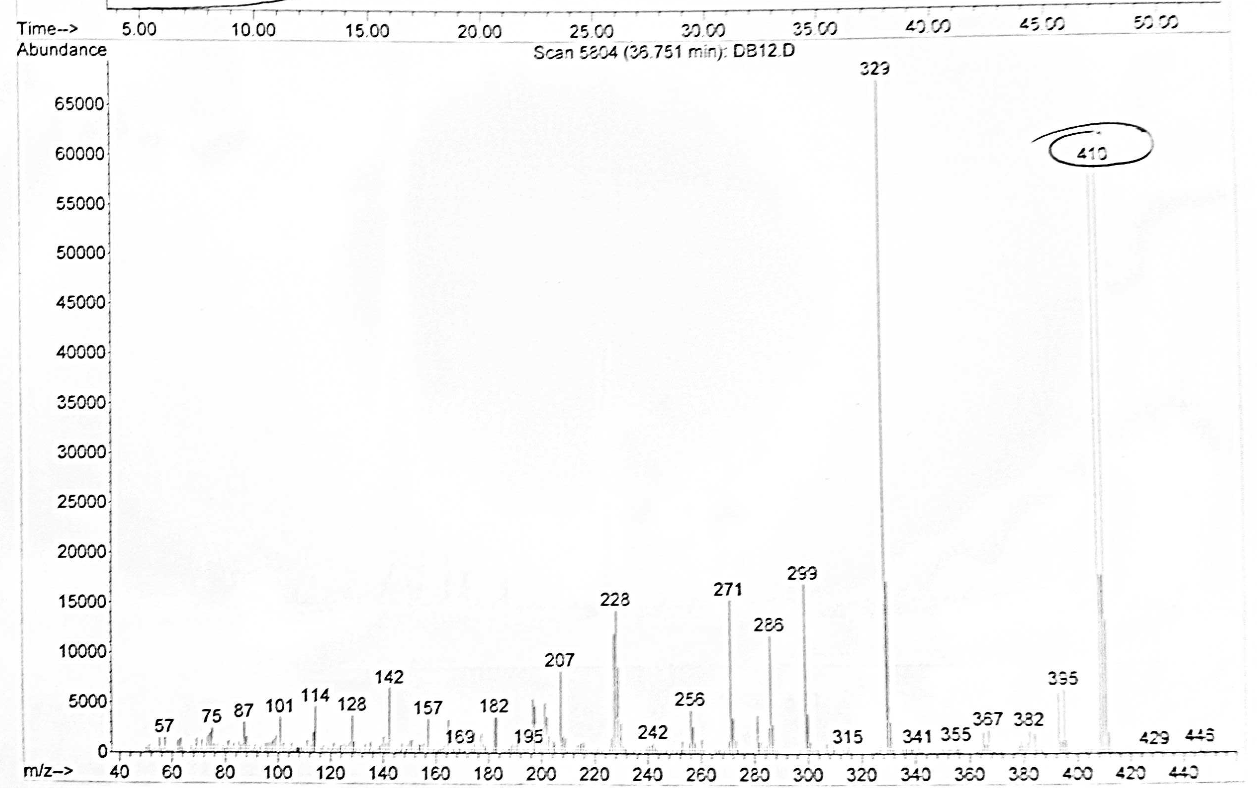
**

**S2**. 1H and 13C NMR spectra for compound **18**

**
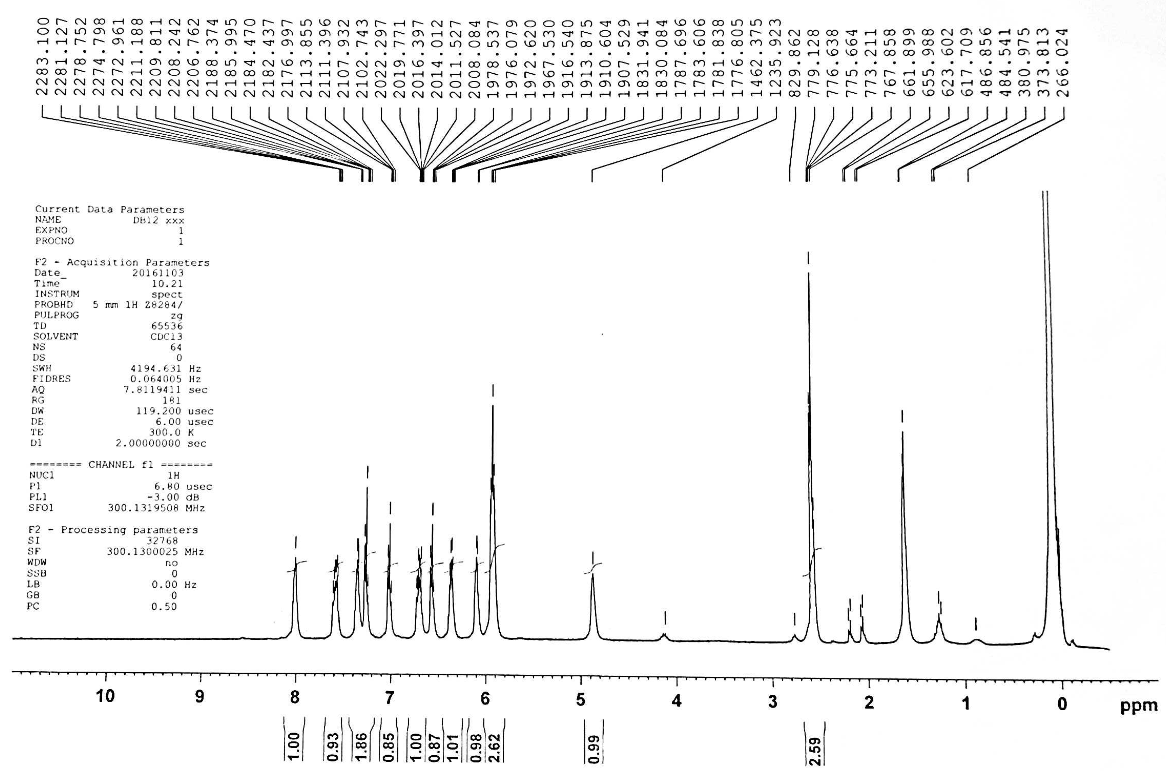
**


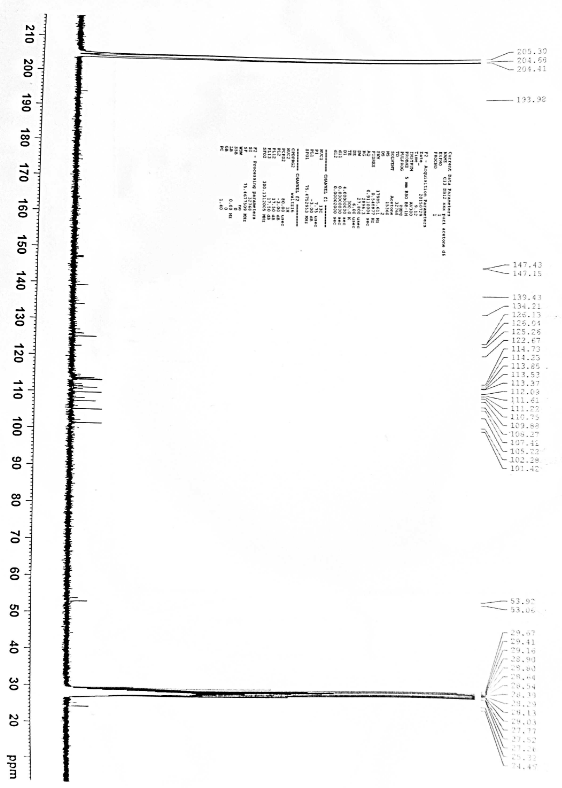


**S3**. MS (EI) spectrum of compound **19**

**
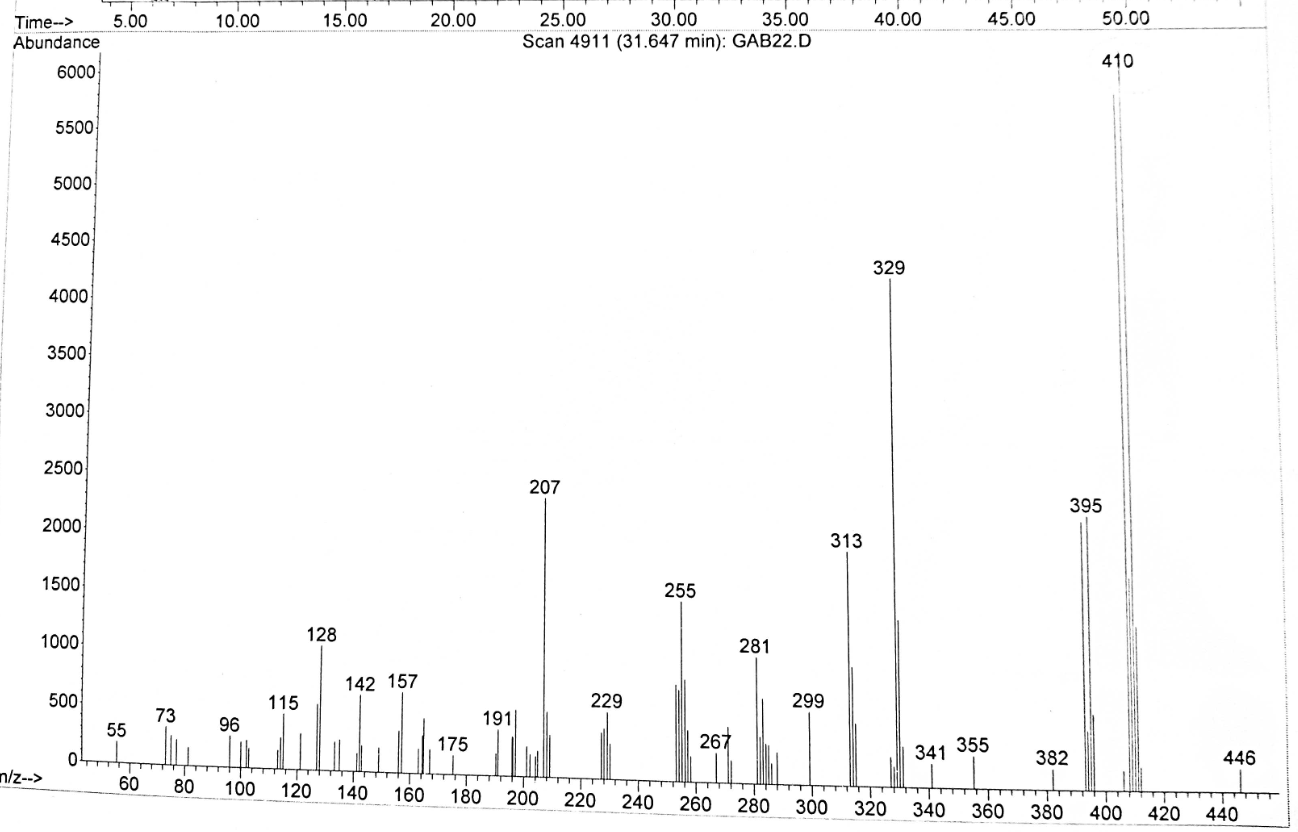
**

**S4**. 1H and 13C NMR spectra for compound **19**

**
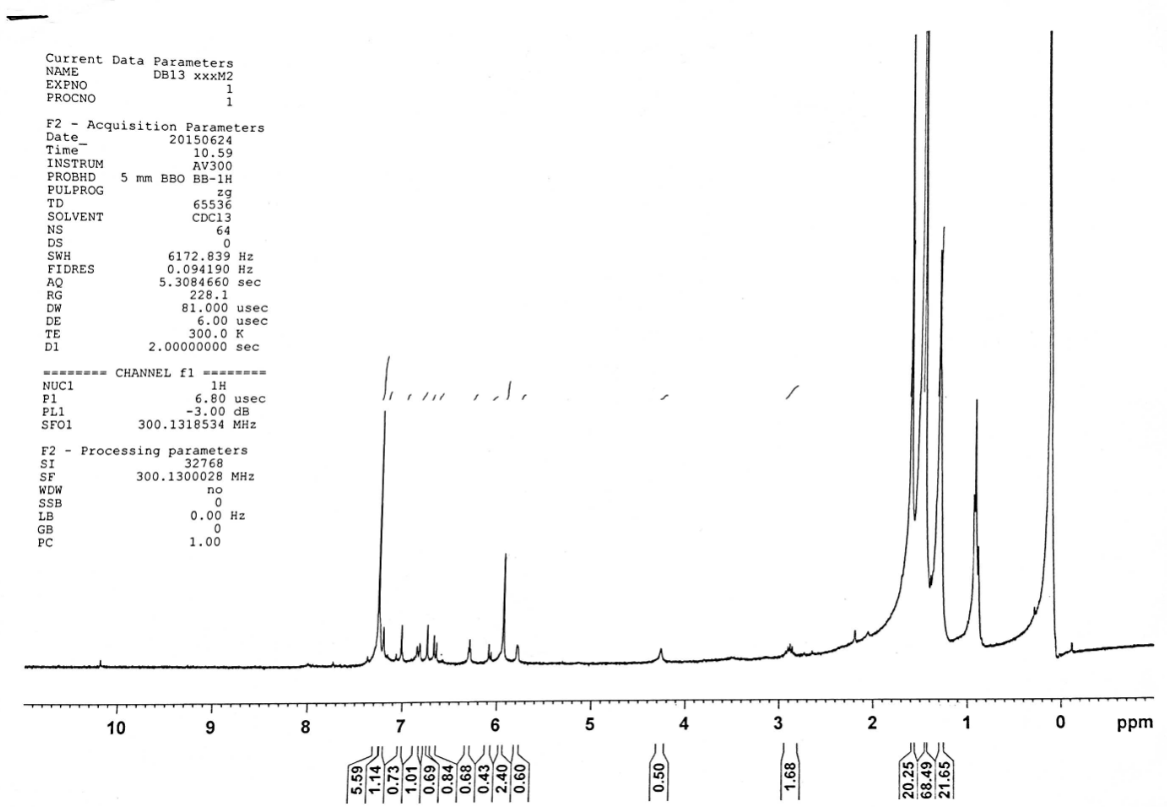
**

**
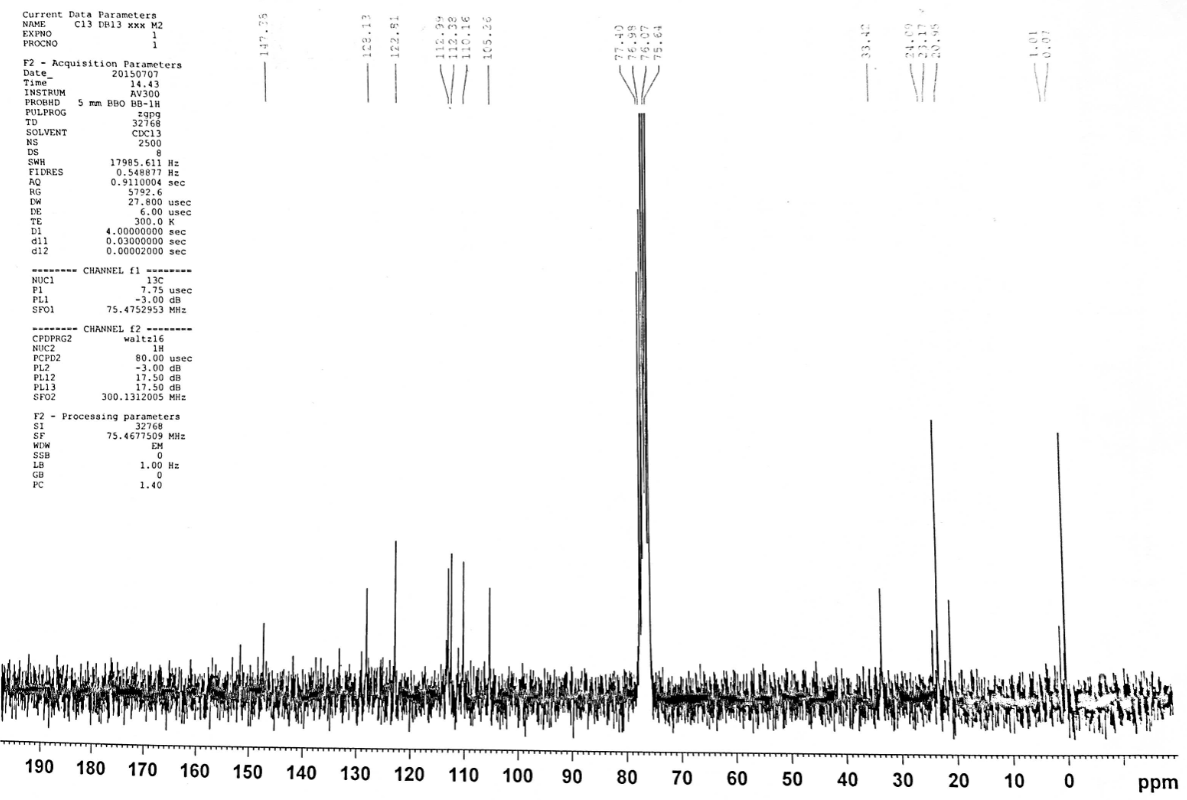
**

**S5**. MS (EI) spectrum of compound **20**

**
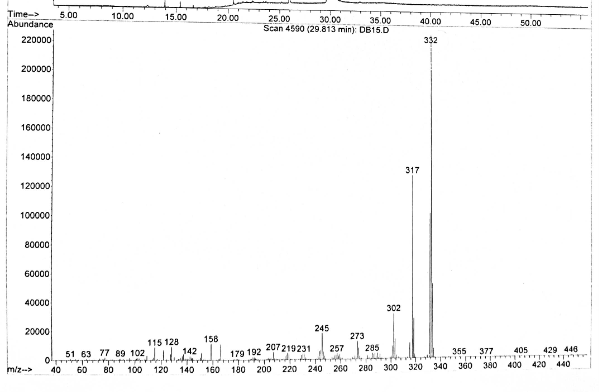
**

**S6**. 1H and 13C NMR spectra for compound **20**

**
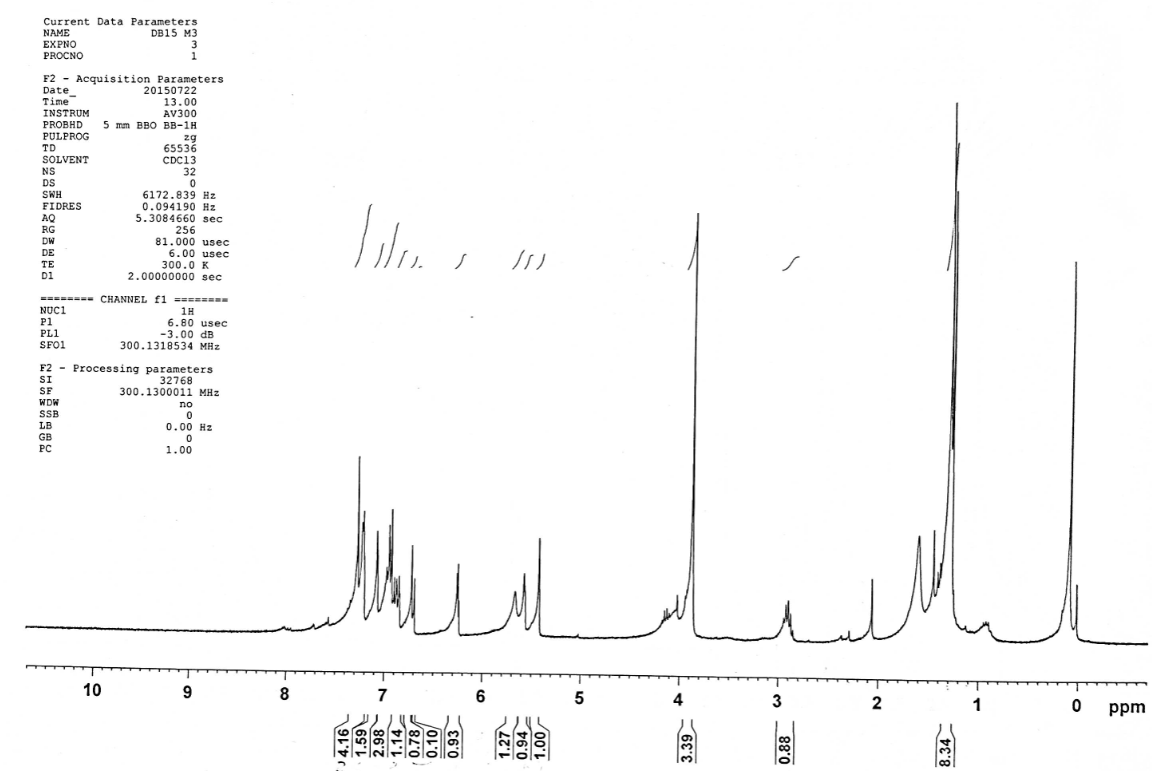
**

**
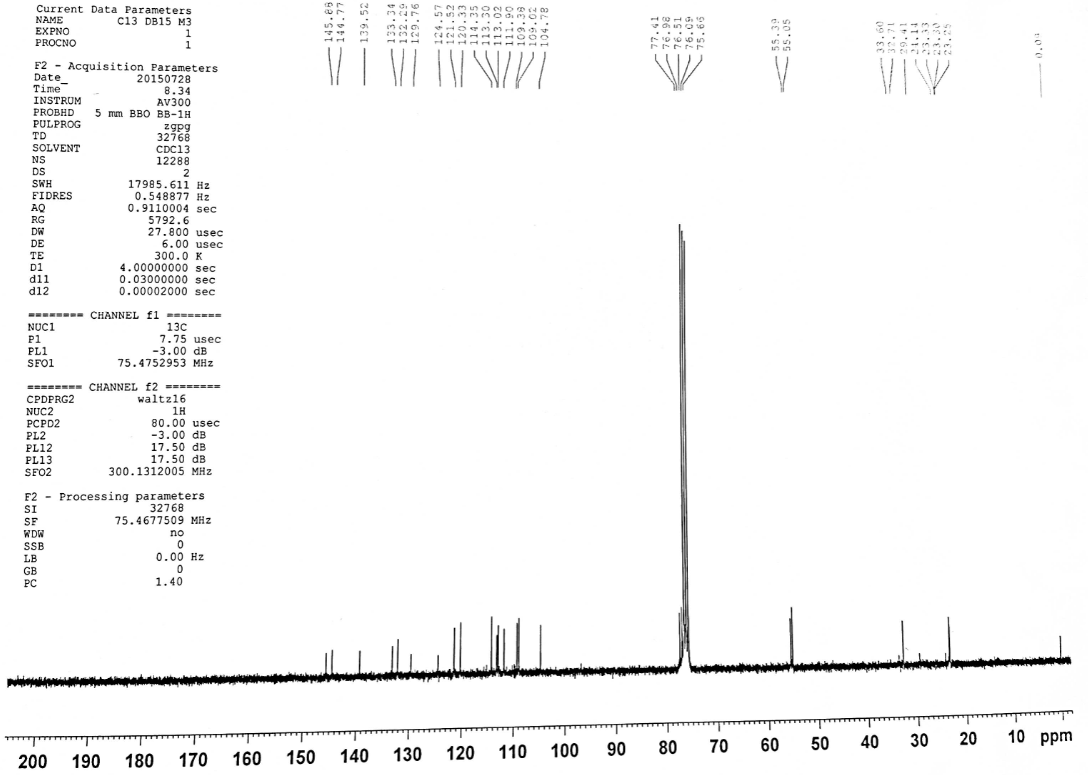
**

**S7**. MS (EI) spectrum of compound **21**


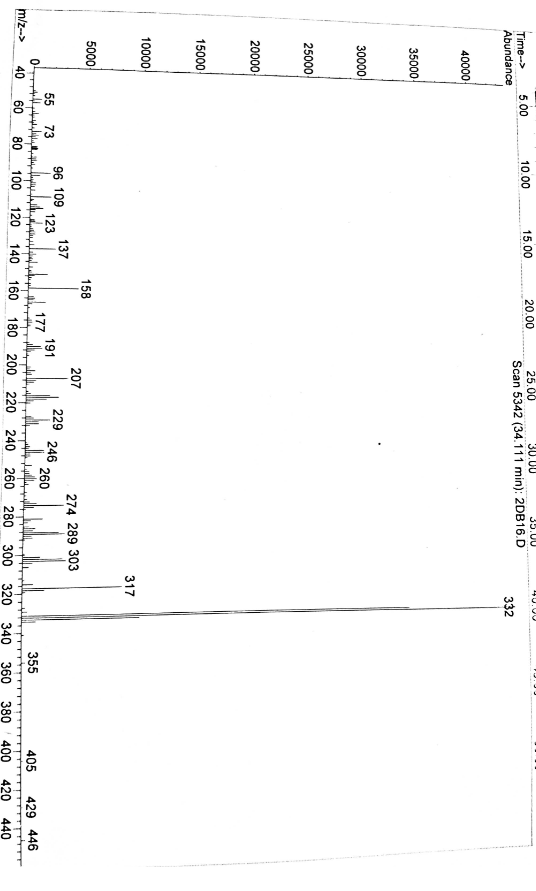


**S8**. 1H and 13C NMR spectra for compound **21**

**
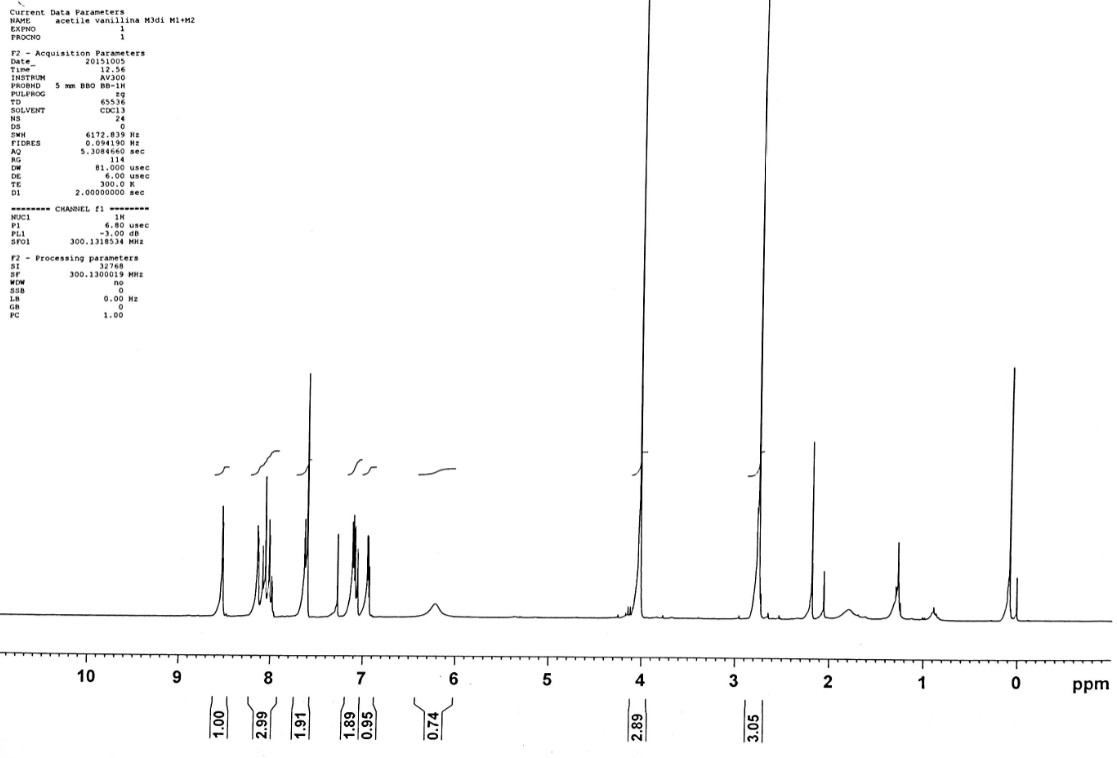
**


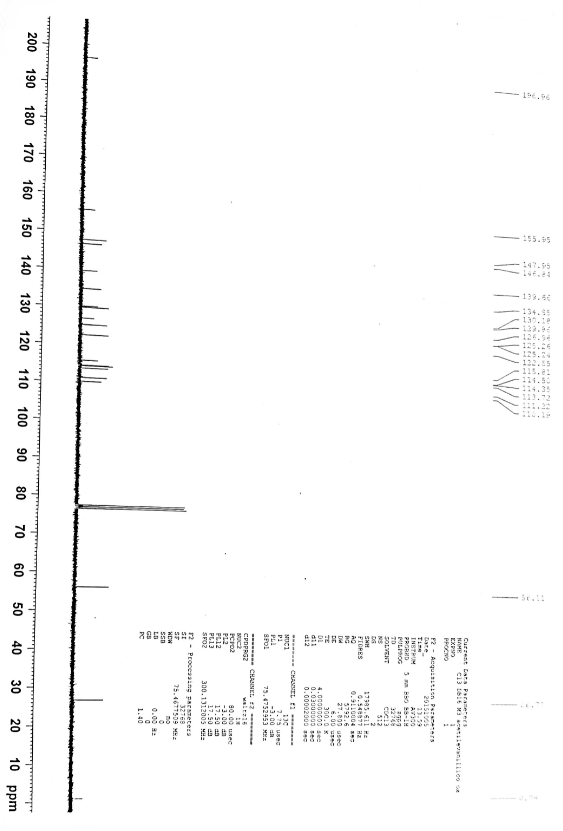

Supplement: f1 [file 5596816.f1.docx]
